# Supplementary material for: Study on Ecological Compensation of Inter-Basin Water Transfer Based on Evolutionary Game Theory
Source: MDPI journal article supplement (doi:10.3390/w14213498), 2022-11-01
Supplement: s1 [file s1]

# Public Opinion Survey Questionnaire on "Residents' Ecological Compensation Willingness for the East Route of South-to-North Water Diversion Project"

Questionnaire Number

Interviewer:

|                           |                         |             |
|---------------------------|-------------------------|-------------|
| Name of respondent: _____ | Telephone number: _____ | Date: _____ |
|---------------------------|-------------------------|-------------|

Hello! We are students of Yangzhou University. Our research team is conducting a public opinion survey on the willingness of the public to ecological compensation for the East Route of the South-to-North Water Diversion Project (ER-SNWDP). The Jinan section of the South-to-North Water Diversion Project (SNWDP) has been completed and put into operation in 2013, and the water diversion plan for 2021 is 89 million m<sup>3</sup>. The SNWDP not only improved the ecological environment of Jinan, but also had a huge impact on economic development. Please talk about your views on SNWDP. We hope to get your cooperation and support. Thank you!

## Screening part

S1. Are you a permanent resident of this city (continuously living for more than six months)?

(Single choice)

1. Yes

2. No ----- Terminate access

S2. Are you 18 years old or older? (Single choice)

1. Yes

2. No ----- Terminate access

## Body part

Q1. Do you know SNWDP in Jinan? (Single choice)

1. Yes

2. No

Q2. Does the ER-SNWDP bring you positive influence? (1. Yes 2. No) If so, what positive impact has it had on you? (Multiple choices).

1. More adequate domestic water consumption and better water quality
2. Keep the springs gushing and promote tourism
3. Improve water ecological environment and protect ecological landscape
4. Promote employment and boost economic development
5. Promote the development of basic industries and increase income
6. Other\_\_\_\_\_

**Q3. Do you think ER-SNWDP is important for the development of Jinan? (Single choice)**

- |                   |                         |           |
|-------------------|-------------------------|-----------|
| 1. Very important | 2. Important            | 3. Common |
| 4. Not important  | 5. Not at all important |           |

**Q4. If you are the beneficiary of ER-SNWDP, are you willing to pay for the water resources and ecological environment protection in the source area? (If you select 1, please continue to answer; if you select 2, please skip to Q7) (Single choice)**

- |        |       |
|--------|-------|
| 1. Yes | 2. No |
|--------|-------|

**Q5. If you are willing to pay a certain amount of money, how much money would you like to spend every year to support this plan? (Single choice)**

- |                        |                 |                   |                   |
|------------------------|-----------------|-------------------|-------------------|
| 1. Less than 100 RMB   | 2. 100-199 RMB  | 3. 200-299 RMB    | 4. 300-399 RMB    |
| 5. 400-499 RMB         | 6. 500-599 RMB  | 7. 600-699 RMB    | 8. 700-799 RMB    |
| 9. 800-899 RMB         | 10. 900-999 RMB | 11. 1000-1499 RMB | 12. 1500-1999 RMB |
| 13. More than 2000 RMB |                 |                   |                   |

**Q6. How would you like to pay this fee? (Single choice)**

- |                      |                                      |                               |
|----------------------|--------------------------------------|-------------------------------|
| 1. Cash              | 2. Charges for water and electricity | 3. Ecological environment tax |
| 4. Volunteer workers | 5. Other_____                        |                               |

**Q7. If you are unwilling to pay for water resources and ecological environment protection in the water-source area, what are your main considerations? (Single choice)**

1. Family with low economic incomes barely make ends meet and is unable to pay
2. The water resources in Jinan are in good condition, so there is no need to transfer water.
3. The ecological environment in the water-source area has nothing to do with me.
4. It should be funded by the government, not by individuals.
5. Not clear.

## Background part

**B1. Gender of interviewee: 1. Male      2. Female**

**B2. What is your age? (Single choice)**

1. 18-29 years old      2. 30-39 years old      3. 40-49 years old      4. 50-59 years old  
5. 60 years old and above

**B3. What is your highest education level? (Single choice)**

1. Primary school and below      2. Junior high school      3. High school or vocational  
4. Junior college      5. University      6. Master or above

**B4. What is the size of your house? (Single choice)**

1. 50 square meters and below      2. 51-99 square meters      3. 100-149 square meters  
4. 150-199 square meters      5. 200 square meters and above

**B5. What is your occupation? (Single choice)**

1. Peasant household      2. Self-employed person      3. Civil servants  
4. Personnel of public institutions      5. Private enterprise operator      6. Employees of state-owned enterprises  
7. Private workers      8. Professional      9. Soldier  
10. Retired personnel      11. Student      12. No stable operation      13. Other\_\_\_\_\_

**B6. What is the average monthly income of your family at present? (Single choice)**

1. 1000 RMB and below      2. 1001-2999 RMB      3. 3000-4999 RMB  
4. 5000-10000 RMB      5. 10001-14999 RMB      6. 15000 RMB and above

**B7. How long have you lived here? (Single choice)**

1. Less than 5 years      2. 5-10 years      3. 10-15 years      4. 15-20 years  
5. More than 20 years

**Thanks again for your cooperation!**
